1 **Variation and selection on codon usage bias across an entire subphylum**

2

3 Abigail L. Labella<sup>1</sup>, Dana A. Opulente<sup>2</sup>, Jacob L. Steenwyk<sup>1</sup>, Chris Todd Hittinger<sup>2</sup>, and Antonis

4 Rokas<sup>1\*</sup>

5

6 1. Department of Biological Sciences, Vanderbilt University, Nashville, TN 37235, USA

7 2. Laboratory of Genetics, Genome Center of Wisconsin, DOE Great Lakes Bioenergy Research

8 Center, Wisconsin Energy Institute, J. F. Crow Institute for the Study of Evolution, University of

9 Wisconsin–Madison, Wisconsin 53706, USA

10

11 \*Correspondence: [antonis.rokas@vanderbilt.edu](mailto:antonis.rokas@vanderbilt.edu)

12

13 Running title: Codon usage bias in budding yeasts

14

15 Keywords: synonymous codon usage; mutational bias; translational selection;

16 Saccharomycotina; tRNA; GC content

17 **Abstract**

18 Variation in synonymous codon usage is abundant across multiple levels of organization:  
19 between codons of an amino acid, between genes in a genome, and between genomes of different  
20 species. It is now well understood that variation in synonymous codon usage is influenced by  
21 mutational bias coupled with both natural selection for translational efficiency and genetic drift,  
22 but how these processes shape patterns of codon usage bias across entire lineages remains  
23 unexplored. To address this question, we used a rich genomic data set of 327 species that covers  
24 nearly one third of the known biodiversity of the budding yeast subphylum Saccharomycotina.  
25 We found that, while genome-wide relative synonymous codon usage (RSCU) for all codons was  
26 highly correlated with the GC content of the third codon position (GC3), the usage of codons for  
27 the amino acids proline, arginine, and glycine was inconsistent with the neutral expectation  
28 where mutational bias coupled with genetic drift drive codon usage. Examination between genes'  
29 effective numbers of codons and their GC3 contents in individual genomes revealed that nearly a  
30 quarter of genes (381,174/1,683,203; 23%), as well as most genomes (308/327; 94%),  
31 significantly deviate from the neutral expectation. Finally, by evaluating the imprint of  
32 translational selection on codon usage, measured as the degree to which genes' adaptiveness to  
33 the tRNA pool were correlated with selective pressure, we show that translational selection is  
34 widespread in budding yeast genomes (264/327; 81%). These results suggest that the  
35 contribution of translational selection and drift to patterns of synonymous codon usage across  
36 budding yeasts varies across codons, genes, and genomes; whereas drift is the primary driver of  
37 global codon usage across the subphylum, the codon bias of large numbers of genes in the  
38 majority of genomes is influenced by translational selection.

39 **Lay Summary / Significance statement**

40 Synonymous mutations in genes have no effect on the encoded proteins and were once thought  
41 to be evolutionarily neutral. By examining codon usage bias across codons, genes, and genomes  
42 of 327 species in the budding yeast subphylum, we show that synonymous codon usage is shaped  
43 by both neutral processes and selection for translational efficiency. Specifically, whereas codon  
44 usage bias for most codons appears to be strongly associated with mutational bias and largely  
45 driven by genetic drift across the entire subphylum, patterns of codon usage bias in a few codons,  
46 as well as in many genes in nearly all genomes of budding yeasts, deviate from neutral  
47 expectations. Rather, the synonymous codons used within genes in most budding yeast genomes  
48 are adapted to the tRNAs present within each genome, a result most likely due to translational  
49 selection that optimizes codons to match the tRNAs. Our results suggest that patterns of codon  
50 usage bias in budding yeasts, and perhaps more broadly in fungi and other microbial eukaryotes,  
51 are shaped by both neutral and selective processes.

## 52 **Introduction**

53 One of the first insights drawn from DNA sequence analyses was that synonymous codons are  
54 used both non-randomly and in taxon-specific patterns (Air et al. 1976; Fiers et al. 1976;  
55 Grantham et al. 1981). These results were surprising given that synonymous codon changes do  
56 not alter primary protein structure (i.e., they are silent) and were therefore previously assumed to  
57 be selectively neutral. Two major explanations have been put forth to account for the non-  
58 random variation in codon usage seen within and across species, namely natural selection and  
59 neutral processes, such as mutational bias coupled with genetic drift.

60

61 The discovery that codon usage is correlated with both the abundance of transfer RNA molecules  
62 in the genome and with gene expression levels raised the hypothesis that optimization of codons  
63 to match the available tRNA pool (or tRNAome) promotes or regulates translation and suggested  
64 a key role for codon usage in translational dynamics (Post et al. 1979; Nakamura et al. 1980;  
65 Ikemura 1981a; Ikemura 1981b; Gouy and Gautier 1982; Sharp and Li 1986; Thomas et al.  
66 1988). It is now well established that codon usage influences multiple cellular processes,  
67 especially translation. For example, usage of codons corresponding to the tRNA pool, known as  
68 codon optimization, has been linked to increased translation speed (Bulmer 1991; Xia 1998;  
69 Chevance et al. 2014; Presnyak et al. 2015), accurate tRNA pairing (Stoletzki and Eyre-Walker  
70 2007; Zhou et al. 2009), suppressed premature cleavage and polyadenylation of transcripts (Zhou  
71 et al. 2018), and mRNA stability (Presnyak et al. 2015; Radhakrishnan et al. 2016). Conversely,  
72 non-optimal codon usage has been associated with translation initiation (Tuller et al. 2010),  
73 accurate protein folding (Zhou et al. 2013; Yu et al. 2015; Buhr et al. 2016), and signal  
74 recognition particle detection (Pechmann et al. 2014). These molecular discoveries are

75 complemented by a plethora of examples where specific synonymous substitutions have  
76 substantial fitness (Agashe et al. 2013; Fragata et al. 2018; Mittal et al. 2018; Ballard et al. 2019)  
77 and phenotypic effects in organisms across the tree of life, including *Escherichia coli* (Krisko et  
78 al. 2014), *Saccharomyces cerevisiae* (Kliman et al. 2003; She and Jarosz 2018), *Drosophila*  
79 *melanogaster* (Carlini and Stephan 2003), and humans (Chamary et al. 2006; Sauna and Kimchi-  
80 Sarfaty 2011; Supek et al. 2014). In summary, there is now substantial evidence to suggest that  
81 codon usage bias of certain codons in certain species is under strong selection—often through  
82 translational mechanisms.

83  
84 In the absence of selection or in populations where genetic drift is more powerful than selection,  
85 patterns of codon usage bias will reflect the effects of genome-wide mutational pressures, such  
86 as mutational bias or GC-biased gene conversion (Sharp and Li 1987; Knight et al. 2001; Chen et  
87 al. 2004; Palidwor et al. 2010; Galtier et al. 2018). This was first suspected for species with  
88 extreme GC composition biases, such as the Gram positive bacterium *Mycoplasma capricolum*,  
89 which has a genomic GC composition of 25%, and only 2% of its codons end with G or C (Sharp  
90 et al. 1993). For species like *M. capricolum*, it was hypothesized that biased genome-wide  
91 mutational processes, such as mutational bias towards A/T bases and GC-biased gene  
92 conversion, would drive patterns of codon usage bias. GC-biased gene conversion has been  
93 shown to influence the GC content of third codon positions in an evolutionarily neutral manner  
94 in mammals, as well as at recombination hotspots in yeasts (Galtier et al. 2001; Harrison and  
95 Charlesworth 2011). Mutational bias has been proposed as the major driver of codon usage bias  
96 in diverse studies in a variety of lineages, including bacteria, archaea, plants, and animals (Chen  
97 et al. 2004; Wan et al. 2004; Palidwor et al. 2010; Clement et al. 2017). Even in the presence of

98 selection on synonymous codon sites, it has been proposed that background substitution drives  
99 codon preference in organisms with widely different GC compositions (Sun et al. 2017). Thus,  
100 major differences in codon usage patterns between species are often considered to be primarily  
101 driven by neutral mutational changes in GC content (Knight et al. 2001; Chen et al. 2004).

102

103 Selective and neutral explanations of codon usage bias are not mutually exclusive, and pioneers  
104 in this field were quick to suggest that codon bias is due to a balance between neutral and  
105 selective processes (Ikemura 1985; Shields and Sharp 1987; Sharp et al. 1993). It is unclear,  
106 however, what that balance is, how it varies across levels of biological organization (e.g.,  
107 codons, genes, genomes) and across lineages, and what factors influence the balance (Bulmer  
108 1991; Sharp et al. 1993; Sharp et al. 1995; Knight et al. 2001; Hershberg and Petrov 2008;  
109 Palidwor et al. 2010).

110

111 Budding yeasts (subphylum Saccharomycotina, phylum Ascomycota) present a unique  
112 opportunity to examine the impact of neutral and selective processes on codon usage bias for  
113 several reasons. First, genomes and genome annotations of 332 species across the subphylum  
114 recently became available (Shen et al. 2018), providing a state-of-the-art data set for the study of  
115 codon usage bias. Second, the genomic diversity across budding yeasts is comparable to the  
116 divergence between different animal phyla or between *Arabidopsis* and green algae, offering us  
117 the opportunity to examine variation in patterns of codon usage bias across a highly diverse  
118 lineage. Third, budding yeasts exhibit genetic code diversity and are the only known lineage with  
119 nuclear codon reassignments. Specifically, three different clades of budding yeasts have  
120 undergone a reassignment of the CUG codon from leucine to serine (two clades) or alanine (one

121 clade) (Kawaguchi et al. 1989; Miranda et al. 2006; Muhlhausen et al. 2016; Riley et al. 2016;  
122 Krassowski et al. 2018). Codon reassignments in the Saccharomycotina provide both a challenge  
123 and an opportunity in comparing codon usage bias across the subphylum. Finally, for the  
124 majority of budding yeast species in our data set we also have metabolic trait (285 species) and  
125 isolation environment (174 species) information, which not only illustrates the ecological  
126 diversity of this group but allows us to test for other contributors to codon usage bias (Kurtzman  
127 et al. 2011; Opulente et al. 2018).

128  
129 To examine codon usage bias at the codon, gene, and genome levels, we examined the genomes  
130 of 327 budding yeast species in the subphylum Saccharomycotina. Analysis of codon usage  
131 bias, measured by relative synonymous codon usage (RSCU) revealed diversity in usage at all  
132 three levels (codon, gene, genome) examined. This variation in RSCU was highly correlated with  
133 GC composition when assessed broadly across the subphylum. Furthermore, the relationship  
134 between the relative frequency of each codon and the GC composition of the 3<sup>rd</sup> codon position  
135 showed very small deviations from the neutral expectation, except for codons for three amino  
136 acids (proline, arginine, and glycine). However, at the gene level, nearly a quarter of all genes  
137 surveyed (381,174/1,683,203; 23%) did not fit the neutral expectation of the relationship  
138 between the effective number of codons and synonymous GC composition. In 94% (308/327) of  
139 the budding yeast genomes, the overall fit of genes to the neutral expectation was very low.  
140 Investigation of possible causes of this deviation revealed that 81% (264/ 327) of budding yeast  
141 genomes exhibited moderate-to-high levels translational selection on codon usage bias. While  
142 there was no significant correlation between the total number of metabolic traits or isolation  
143 environments and selection, the strength of selection was significantly correlated with genomic

144 tRNA gene content (tRNAome). These results suggest that translational selection on codon bias  
145 is widespread, but not ubiquitous, in the budding yeast subphylum. Our inference of strong  
146 translational selection on codon usage bias suggests that translational regulation has played a  
147 major role in the evolution of this group.

148

## 149 **Methods**

### 150 **Sequence Data**

151 Genomic sequence and annotation data were obtained from a recent comparative genomic study  
152 of 332 budding yeast genomes (Shen et al. 2018) (Supplementary Table 1). Genomes of five  
153 species from the CUG-Alanine clade were removed from this analysis as their codon  
154 reassignment was discovered recently (Muhlhausen et al. 2016; Riley et al. 2016) and could not  
155 be accounted for by any existing software. To remove mitochondrial genome sequences from the  
156 remaining 327 budding yeast genomes, we employed blastn, version 2.6.0+ (Altschul et al. 1990;  
157 Camacho et al. 2009) with 56 partial or complete Saccharomycotina mitochondrial genomes  
158 (Supplementary Table 2) as our input queries. Hits that had 30 percent or more sequence identity  
159 to mitochondrial sequences were removed from our analyses. Similarly, protein-coding gene  
160 sequence data from the 327 genomes were filtered for mitochondrial genes by blasting (blastx)  
161 against mitochondrial protein-coding sequence data from 37 Saccharomycotina species  
162 (Supplementary Table 3). The coding sequences were further filtered to conform to the required  
163 input for the species-specific tRNA adaptation calculations by stAIconc, version 1.0 (Sabi and  
164 Tuller 2014). This filtering step removed all coding sequences that did not begin with the start  
165 codon ATG, did not have a whole number of codons, or were shorter than 100 codons  
166 (Supplementary Table 1). Codons containing ambiguous bases were also removed.



167

## 168 **Codon usage bias calculations**

169 To examine the variation in codon usage across the yeast subphylum, we calculated the relative  
170 synonymous codon usage (RSCU) for each codon in the 1,683,203 protein-coding genes of the  
171 327 budding yeast genomes that remained after filtering. RSCU is the observed frequency of a  
172 synonymous codon divided by the frequency expected if all the synonymous codons were used  
173 equally (Sharp and Li 1986). We computed RSCU values using DAMBE7, version 7.0.28 (Xia  
174 2018), because it allowed us to accommodate the known nuclear codon reassignment in the  
175 CUG-Ser1 and CUG-Ser2 clades (Kawaguchi et al. 1989; Miranda et al. 2006; Muhlhausen et al.  
176 2016; Riley et al. 2016; Krassowski et al. 2018).

177

178 To examine broad patterns of codon usage, hierarchical clustering of all RSCU values for each  
179 species was calculated and visualized in the R programming environment. To investigate which  
180 codons drive between-species differences in codon usage, we performed correspondence analysis  
181 of RSCU values (Grantham et al. 1981). This technique is highly suitable and informative  
182 because it reduces the high number of dimensions present in codon usage statistics into a very  
183 small number of axes (Grantham et al. 1980; Suzuki et al. 2008).

184

185 To examine the influence of phylogeny on the observed variation in codon bias, we computed  
186 two measures of phylogenetic signal in R, Pagel's  $\lambda$  (Pagel 1999) and Blomberg's K (Blomberg  
187 et al. 2003). The phylogeny used for this analysis was obtained through maximum likelihood-  
188 based inference from a data matrix comprised of 2,408 genes obtained from Shen et al. (2018).

189

## 190 **Mutational bias and codon usage**

191 To assess the role of mutational bias in determining the observed patterns of codon bias in the  
192 yeast subphylum, we tested the observed patterns against neutral expectations, both across  
193 species and across codons. Between-species patterns in codon usage bias were measured by  
194 calculating the Pearson's correlation of the RSCU of each codon against the GC composition of  
195 the 3<sup>rd</sup> codon position (GC3) across all genes in each genome, for each of the 327 species. To  
196 account for the observed phylogenetic dependence within both variables, we also assessed the  
197 relationship between RSCU and GC3 using the phylogenetic generalized least squares (PGLS).  
198 The influence of mutational bias within each set of codons encoding an amino acid was assessed  
199 by comparing the equilibrium solutions for relative codon frequencies based on GC3 content  
200 generated by Palidwor et al. (2010) to the empirical values. Observed relative codon frequencies  
201 were calculated as the total number of observations of a codon divided by the total number of  
202 observations of the corresponding amino acid. Total codon counts within the genomes were  
203 calculated in DAMBE version 7.0.28 (Xia 2018). For each codon, predicted values of relative  
204 frequency were generated from the corresponding equilibrium solution.  $R^2$  values were then  
205 calculated based on the predicted and empirical relative frequency values. Data from the 98  
206 genomes present in the CUG-Ser1 and CUG-Ser2 clades were removed from the analyses of the  
207 amino acids leucine and serine.

208

209 To assess the influence of mutational bias within every genome, we compared the effective  
210 number of codons (ENC) (Wright 1990) of each gene to the synonymous GC3 proportion of that  
211 gene. The  $N_c$  for each gene within the 327 genomes was computed in DAMBE version 7.0.28

212 using the improved index created by Sun et al. (2013), which allows for CUG codon  
213 reassignments to serine (Xia 2018). This distribution was compared against the predicted neutral  
214 distribution proposed by dos Reis et al. (2004) using the suggested parameters. This neutral  
215 distribution is a modified version of Wright's proposed function (Wright 1990) for calculating  
216 ENC (dos Reis et al. 2004). We computed an  $R^2$  value between the observed and empirical ENC  
217 values based on the GC3 of each gene. To ensure that  $R^2$  values were not driven by phylogenetic  
218 signal, we calculated Blomberg's K for the  $R^2$  values.

219

### 220 **Calculation of selection on codon usage**

221 To determine if selection on translational processes has optimized the codon usage within each  
222 species, we tested if there is a significant correlation between the selective pressure on a gene  
223 and its level of optimization to the tRNAome for every genome. First, the species-specific value  
224 for each codon's relative adaptiveness ( $w_i$ ) was calculated in stAICalc, version 1.0 (Sabi and  
225 Tuller 2014). Calculation of  $w_i$  values requires genomic tRNA counts, which we calculated in  
226 tRNAscan-SE 2.0 for all species (Lowe and Chan 2016). The results from tRNAscan-SE 2.0  
227 correctly identified the CUG-Ser1 and CUG-Ser2 tRNAs that have a CAG anticodon but the  
228 recognition elements for serine (Supplementary Table 4). The species-specific tRNA adaptation  
229 index of each gene was then calculated by taking the geometric mean of all  $w_i$  values for the  
230 codons (except the start codon). One drawback of stAICalc is that it does not account for the  
231 nuclear codon reassignment in the CUG-Ser1 and CUG-Ser2 clades. Therefore, we also tested all  
232 genomes after removing all CUG codons from all sequences.

233

234 To test whether selection has influenced codon usage bias, we calculated the S-value proposed  
235 by dos Reis et al. (2004). This metric is the correlation between the tRNA adaptation index  
236 (stAI) and the confounded effects of the selection effect of the codon usage of a gene and  
237 uncontrollable random factors. Ultimately, the S-value measures the proportion of codon bias  
238 variance that cannot be explained by mutational bias or random factors alone. S-values were  
239 calculated with the R package tAI.R, version 0.2 (<https://github.com/mariodosreis/tai>) for each  
240 genome using the previously calculated stAI values. We calculated the S-value twice for each  
241 genome: once with CUG codons included and once without CUG codons.

242

243 To test whether the S-value for a given genome significantly deviated from what would be  
244 expected under neutrality, we ran a permutation test. Specifically, we ran 10,000 permutations  
245 where each genome's  $w_i$  values were randomly assigned to codons, the tAI values were then  
246 recalculated for each gene, and the S-test was run on that permutation. A genome's observed S-  
247 value was considered statistically significant if it fell in the top 5% of the distribution formed by  
248 the 10,000 values obtained by the permutation analysis.

249

250 To investigate which features may influence the level of translational selection occurring within  
251 a genome, we tested the contributions of tRNAome size (calculated from tRNA-scan-SE),  
252 genome size, number of predicted coding sequences, total number of reported metabolic traits,  
253 and total number of reported isolation environments (Shen et al. 2018) on S-value variation. We  
254 performed linear regression analysis on individual and combinations of variables in R. In  
255 addition to the linear models, we tested a Gaussian distribution on a subset of features based on

256 visual inspection. We also tested a PGLS analysis on S-value distribution to examine correlations  
257 that may be corrected by phylogenetic consideration.

258

## 259 **Results**

### 260 **Budding yeast genomes exhibit substantial variation in codon usage**

261 To measure variation in codon usage bias across budding yeast genomes, we measured the  
262 RSCU of each codon in each Saccharomycotina species. Hierarchical clustering of the codons  
263 revealed three major groups of codons (Fig. 1). One group contained codons that were generally  
264 overrepresented (RSCU > 1) in budding yeast genomes, which included A/U-ending codons and  
265 one G/C-ending codon (UUG). The next group contained mostly G/C-ending codons and two  
266 A/U-ending codons (AUA and GUA) that were generally underrepresented (RSCU < 1) across  
267 budding yeast genomes. Finally, the smallest group contained A/U-ending codons (CUA, UUA,  
268 CGA, GGA, AUA, CCU, and GUA) that were relatively underrepresented across some budding  
269 yeast genomes as compared to the first set of A/U-ending codons. Interestingly, the  
270 underrepresentation of the CUA codon, which encodes leucine, was driven most strongly by the  
271 CUG-Ser1 and CUG-Ser2 clades where the CAG leucine codon has been recoded as serine (Fig.  
272 1).

273

### 274 **Genome-level variation in codon usage corresponds with mutational bias**

275 To summarize the overall variation in codon usage between species, we conducted a  
276 correspondence analysis on RSCU across all 327 species. The majority of the variation in codon  
277 usage between species was described by the first dimension of the correspondence analysis  
278 (66.891%; Fig. 2), which was driven by differential usage of codons that vary at the third codon

279 position, with the codons UUA, CGU, GGC and GUG making the largest contributions  
280 (Supplementary Figure 1a). The second axis, which explained 7.093% of the variation in codon  
281 usage, showed some clustering by clade, with the CUG-Ser clade, the CUG-Ser2 clade and the  
282 only member of the Alloascoidea clade (*Alloascoidea hylecoeti*) clustering separately from the  
283 rest of the clades. This clustering was driven primarily by the codons CUA, CUG, UUG, and  
284 UUA (Supplementary Figure 1b), with species in the CUG-Ser, CUG-Ser2 and *A. hylecoeti*  
285 being underrepresented in CUA and CUG and overrepresented in UUA and UUG. These four  
286 codons are all canonically decoded as leucine, suggesting that the reassignment of the CUG  
287 codon in the CUG-Ser1 and CUG-Ser2 clades is largely responsible for the separation of CUG-  
288 Ser1 and CUG-Ser2 clades from the rest. This result, however, does not explain the clustering of  
289 *A. hylecoeti*, which had the second highest overrepresentation of the UUA codon among the  
290 sampled Saccharomycotina, including the CUG-Ser1 and CUG-Ser2 clades. *A. hylecoeti* is the  
291 only representative genome of the major clade Alloascoideaceae in the dataset, and its genome  
292 contains tRNAs that decode all of the leucine codons, except for CUC. Moreover, there is no  
293 evidence of alternative codon usage in this species (Muhlhausen et al. 2018). Additional species  
294 in this major clade will need to be sequenced to further understand why *A. hylecoeti* is an outlier  
295 in the relative usage of the UUA codon.

296

297 We next tested whether values of the RSCU metric across species had phylogenetic signal by  
298 measuring Pagel's  $\lambda$  (Pagel 1999) and Blomberg's K (Blomberg et al. 2003; Ives et al. 2007;  
299 Revell 2012) (Supplementary Table 5). Pagel's  $\lambda$  tests for the presence of phylogenetic signal in  
300 a given trait using tree transformation—making the tree more or less star-like. Values for Pagel's  
301  $\lambda$  vary from 0, which denotes that the trait absence of any phylogenetic signal, to 1, which

302 denotes that the trait varies according to a Brownian model of random genetic drift. Codons'  
303 values for Pagel's  $\lambda$  ranged from 0.953 (for CUU) to 1 (for multiple codons) with p-values of  
304  $\ll 0.001$ . These data suggest that codon usage between closely related species is more similar  
305 than expected under a Brownian motion model. Blomberg's K measures the ratio of trait  
306 variation among species to the contrasts variance. If the trait varies according to a Brownian  
307 model of random genetic drift Blomberg's K will equal 1. Blomberg's K however can be greater  
308 than 1 which indicates that variance in the trait occurs between clades (versus within.)  
309 Interestingly, examination of Blomberg's K identified between-clade variance ( $K > 1$ ) for only the  
310 codons CGA, CCA, UUG, and CUA, with the majority of the variance of the remaining codons  
311 present within major clades ( $K < 1$ ). Taken together, Pagel's  $\lambda$  and Blomberg's K suggest that the  
312 phylogenetic signal for most codons resides towards the tips of the phylogeny and explains  
313 variation in RSCU between closely related species. Two of the four codons that have  
314 phylogenetic signal deeper in the phylogeny (UUG and CUA) canonically encode leucine and  
315 were identified as drivers of the second explanatory axis in the correspondence analysis. This  
316 result suggests that the phylogenetic correlation between CGA, CCA, UUG and CUA is not  
317 restricted to closely related species and represents phylogenetically-driven differences between  
318 major clades, whereas the phylogenetic correlation of most other codons is only between closely  
319 related species and not between major clades.

320

### 321 **Individual codon usage is driven by neutral and non-neutral forces**

322 The correspondence analysis of RSCU revealed that major differences in codon usage are largely  
323 explained by differences in the usage of G/C- and A/U-ending codons (Fig. 2). To determine the  
324 influence of neutral mutational bias on the usage of individual codons, we used Pearson's

325 correlation and phylogenetic generalized least squares (PGLS) to examine the relationship  
326 between codon usage and mutational bias. Across all species, the Pearson's correlation of GC3  
327 and RSCU revealed that all G/C-ending codons and two A/U-ending codons were positively  
328 correlated with GC3 ( $p$ -value  $< 0.001$  in all cases) (Supplementary Table 6). The two A/U-  
329 ending codons that were positively correlated with GC composition bias were CUU and CGA.  
330 Interestingly, CGA was one of the codons identified by Blomberg's K as being phylogenetically  
331 differentiated between clades. It is, therefore, not surprising that CGA and CUU are negatively  
332 correlated with GC3 in the phylogenetically corrected PGLS analysis (Fig. 3, Supplementary  
333 Table 7). In the PGLS analysis all A/U-ending codons are negatively correlated with GC3 and all  
334 G/C-ending codons are positively correlated with GC3. These results reveal that there is a strong  
335 correlation between mutational bias and codon usage at the genome level.

336  
337 While the Pearson's correlation and PGLS analyses suggest that codon bias and GC composition  
338 due to mutational bias are correlated, these metrics do not account for the non-linear relationship  
339 between GC composition and codon usage. Therefore, we compared observed relative codon  
340 frequencies with equilibrium solutions generated by Palidwor et al. (2010). We compared the  
341 observed relative codon frequencies for every codon with the equilibrium solutions and  
342 measured fit using  $R^2$  (Fig. 4; Supplementary Table 8). All but one of the 2-fold degenerate  
343 codons had an  $R^2$  value  $> 0.5$  when compared to the neutral expectation (Fig. 4C). For example,  
344 the codon GCC fit the neutral expectation very well ( $R^2 = 0.671$ ; Fig 4a). The only 2-fold  
345 degenerate amino acid encoded by a codon that had an  $R^2 < 0.5$  was phenylalanine ( $R^2 = 0.236$ ).  
346 For the 3-fold and 4-fold degenerate codons, the  $R^2$  values for the individual codons varied but,  
347 as previously noted (Palidwor et al. 2010), the summed predictions for G/C-ending codons and



348 A/T-ending codons better fit the neutral expectation (Fig. 4C: second column). The exceptions to  
349 this were proline, arginine, and glycine, which showed deviations from the neutral expectation  
350 even with the summed statistics (Fig. 4B). To ensure that phylogenetic signal was not driving the  
351 deviations from the neutral expectation, we assessed Blomberg's K of the individual species'  
352 residuals used to compute the  $R^2$  value. A total of 7 codons had Blomberg's K variances over 1  
353 (Fig. 4C: Supplementary Table 8), suggesting that deviations from the neutral expectation were  
354 driven by differences between major clades. Even after accounting for phylogenetic signal and  
355 the improved fit of the summed predictions, codons for proline, glycine, and arginine still  
356 showed deviations from the neutral expectation, suggesting that their usages are at least partially  
357 driven by selection.

358

### 359 **Gene-level codon usage does not fit the neutral expectation**

360 To assess the role of mutational bias across all genes within each genome, we next examined the  
361 relationship between the ENC of each gene and its GC3s vis-a-vis the neutral expectation (i.e.,  
362 the relationship between ENC and GC3s if neutral mutational bias were the only force acting on  
363 codon usage). For each genome, we computed the number of genes that fell 10% and 20% of the  
364 maximum value outside of the neutral expectation between NC and GC3s (dos Reis et al. 2004).  
365 Out of a total of 1,683,203 genes, 381,174 (23%) genes fell outside the 10% threshold and  
366 205,558 (12%) fell outside of the 20% threshold (Fig. 5A; Supplementary Table 9). We also  
367 tested each species' overall fit to the neutral expectation by calculating an  $R^2$  fit to the neutral  
368 expectation (Fig. 5B & 5C). This analysis revealed that 7 genomes had  $R^2$  values greater than  
369 0.5, suggesting that codon usage in these species can largely be explained by neutral mutational  
370 bias. Twelve species had an intermediate  $R^2$  value between 0.25 and 0.5 (or [0.25 – 0.50]),

371 suggesting that neutral mutational bias is partially responsible for codon usage in most genes in  
372 these species. Finally, 72 species had low  $R^2$  values between 0.00 and 0.25, while the remaining  
373 277 species had values below 0. The species with low and negative  $R^2$  values deviate from the  
374 neutral expectation, suggesting that mutational bias is not the sole driving factor of codon bias  
375 within these genomes.

376

### 377 **Codon usage in most budding yeast genomes is under translational selection**

378 The previous analysis suggested that most Saccharomycotina species deviate from the strictly  
379 neutral expectation between GC3s and NC within their genomes (Fig. 5). To test whether  
380 translational selection influenced codon usage in budding yeast genomes, we calculated the S-  
381 value or the amount of selection on codon usage due to tRNA adaptation. To determine the effect  
382 of not accounting for CUG codon reassignment in our analysis, we calculated S-values for  
383 genomes with CUG and with all CUG codons removed (Supplementary Table 10). The  $R^2$  value  
384 when comparing the S-value for the CUG and CUG-removed datasets was 0.99. This suggests  
385 that our results are valid despite not accounting for the codon reassignment. S-values could not  
386 be produced for the species *Martiniozyma abiesophila*, *Nadsonia fulvescens* var. *fulvescens*, and  
387 *Botryozyma nematodophila*, because they did not produce viable  $w_i$  values from stAI-calc due to  
388 software issues (Supplementary Table 11). S-values were computed for the remaining 324  
389 species, and significance was assessed using a permutation test (Fig. 6A). Thirty-four species  
390 from 6 of the 9 clades did not have S-values that were significant at the 0.05 or 0.95 level in the  
391 permutation test (Supplementary Table 10). These non-significant results ranged in S-value  
392 between -0.252 and 0.577, with a median value of 0.273. This result suggests that, in these  
393 species, gene-level codon usage could not be distinguished from neutral mutational bias;

394 therefore, it is unlikely that translational selection is broadly acting in these species. In contrast,  
395 27 species exhibit moderate S-values between 0.28 and 0.5 (Fig. 6B), on par with levels of  
396 translational selection observed in *C. elegans* (S-value of 0.45; dos Reis et al. 2004). A  
397 moderately high S-value between 0.5 and 0.75 was observed in 157 species. Finally, a very high  
398 S-value above 0.75 was observed for 107 species, including *S. cerevisiae* (Fig. 6C), as previously  
399 reported (dos Reis et al. 2004). Overall, 291 / 324 (94%) of genomes examined showed moderate  
400 to very high S-values, suggesting that translational selection is widespread across budding yeast  
401 genomes.

402

### 403 **Translational selection is weakly associated with tRNAome size**

404 To determine which features are associated with S-values, we examined the relationship between  
405 S-values with the combinations of two or more of the following features: genome size,  
406 tRNAome size, gene number, number of metabolic traits, and number of isolation environments  
407 (Supplementary Table 12). The linear model with the highest explanatory power, which  
408 accounted for 17.47% of the variation in S-value, includes genome size, tRNAome size, gene  
409 number, and total metabolic traits (Supplementary Table 13). Among the four features in the  
410 model, tRNAome size had the biggest contribution, followed by genome size, gene number, and  
411 reported metabolic traits (0.612 versus 0.229, 0.119, and 0.039, respectively.) To gain further  
412 insight into the contribution of the tRNAome size, we tested a Gaussian model (Fig. 7) based on  
413 previously reported analyses (dos Reis et al. 2004). The  $R^2$  value of the Gaussian model was  
414 higher than that of the linear model (0.11 vs 0.04), although neither model had a very good fit.  
415 The Gaussian model suggests that the maximum selection occurs at an intermediate tRNAome  
416 size. Interestingly, the estimated maximum for S-value occurs at a tRNAome size of 336 tRNA

417 genes, a value similar to the tRNA<sub>ome</sub> size that corresponds with the maximum modeled S-value  
418 from previous models (tRNA<sub>ome</sub> of about 300) (dos Reis et al. 2004). The phylogenetically  
419 corrected PGLS analysis revealed no correlation between S-value and either genome size or  
420 tRNA<sub>ome</sub> (Supplementary Fig. 2). Overall, none of the features we tested had strong  
421 associations, individually or additively, with S-value, even when phylogenetically corrected.  
422

## 423 **Discussion**

424 In this study, we surveyed the patterns and forces underlying codon bias across 327 budding  
425 yeasts from the subphylum Saccharomycotina. Cluster, correspondence, and correlation analyses  
426 of the relative synonymous codon usage across the subphylum is consistent with mutational bias  
427 as a significant driver of codon bias—A/U ending codons are generally overrepresented and G/C  
428 ending codons are generally underrepresented. This finding is consistent with the low GC  
429 content (average silent GC context of 42%) found across the subphylum. Several previous  
430 studies have suggested that genome-wide mutational processes are the primary drivers of  
431 genome-wide codon usage (Knight et al. 2001; Chen et al. 2004; Wan et al. 2004), and we  
432 clearly observed the influence of these neutral processes at the genome level. Notably, we also  
433 found evidence of selection in both specific codons and genes, which we discuss below.

434  
435 At the level of individual codon usage, two codons in particular—CGA and CUA—had multiple  
436 lines of evidence for violating assumptions of neutral GC-mutational bias. For CGA, our results  
437 are consistent with previous reports that decoding of the CGA codon in *S. cerevisiae* is inhibitory  
438 to translation due to codon-anticodon interactions (Letzring et al. 2010; Letzring et al. 2013).  
439 This effect, however, may not be universal across the Saccharomycotina: CGA was

440 underrepresented (RSCU < 1) in 222 species but overrepresented (RSCU > 1) in 105 species.  
441 RSCU of CGA also varies between major clades of the Saccharomycotina with the  
442 Dipodascaceae/Trichomonascaceae clade having the highest average RSCU (1.47) and the  
443 Phaffomycetaceae clade having the lowest average RSCU (0.66). Given that  
444 Dipodascaceae/Trichomonascaceae clade is distantly related to Saccharomycetaceae, the major  
445 clade that *S. cerevisiae* belongs to, it is likely that the two independent defects in translation that  
446 result in the inhibitory nature of CGA in *S. cerevisiae* (Letzring et al. 2013) evolved within  
447 Saccharomycetaceae, after the divergence of the two clades. The codon CGA is not the only  
448 arginine encoding codon to violate the neutral assumptions (Fig. 4C). Deviations in the  
449 remaining arginine codons may be a result of strong directional selection due to the large number  
450 of degenerate codons encoding arginine, which may result in more opportunities for poor codon-  
451 tRNA pairing (Duret and Mouchiroud 1999; McVean and Vieira 2001).

452

453 For CUA, departure from assumptions of neutral GC-mutational bias are likely driven by the  
454 reassignment of CUG in the CUG-Ser1 and CUG-Ser2 clades, which had profound effects on the  
455 remaining leucine codons since the majority of CUG codons that remained leucine were  
456 reassigned to UUG or UUA (Massey et al. 2003; Miranda et al. 2006). This conclusion is  
457 supported by the observation that the CUA codon is underrepresented in the CUG-Ser1 and  
458 CUG-Ser2 clades (Fig. 1; Supplementary Table 14) compared to other major clades in the  
459 subphylum (Fig. 1; Supplementary Table 14). Underrepresentation of CUA is not exclusive to  
460 the CUG-Ser2 and CUG-Ser1 clades—the Dipodascaceae/Trichomonascaceae major clade had  
461 an average RSCU of 0.60 and includes 12 species (of 37) with a very low RSCU less than 0.5.  
462 This may suggest that the Dipodascaceae/Trichomonascaceae major clade experienced similar

463 evolutionary pressures to those that may have contributed to codon reassignment, such as the  
464 hypothesized presence of a Virus-Like Element with killer activity in the CUG-Ser1 and CUG-  
465 Ser2 clades (Krassowski et al. 2018). The most studied member of the  
466 Dipodascaceae/Trichomonascaceae major clade, *Yarrowia lipolytica*, possesses virus-like  
467 particles, but these particles do not appear to be associated with a killer phenotype (Tréton et al.  
468 1985; el-Sherbeini et al. 1987). This finding highlights the strong impact of codon reassignment  
469 on codon usage.

470  
471 We also observed deviations from the neutral expectation in all codons that encode proline.  
472 Biases in proline codon usage may be related to proline-induced stalling in translation (Artieri  
473 and Fraser 2014). This stalling was observed in *S. cerevisiae* riboprofiling data (Artieri and  
474 Fraser 2014) and may be related to the slow incorporation of proline into the growing amino acid  
475 chain due to its imino side-chain (Pavlov et al. 2009; Doerfel et al. 2013). Additionally, in *S.*  
476 *cerevisiae*, codons for proline and glycine (which also deviate from the neutral expectation) are  
477 involved in frameshift suppression via suppressor tRNAs that contain four-base anticodon  
478 sequences that allow for frameshift read-through (Donahue et al. 1981; Gaber and Culbertson  
479 1982). As a whole, the results of the codon-specific analysis suggest that while many codons are  
480 highly correlated with mutational bias, specific codons may be under a variety of selective  
481 forces—especially translational selection—that alter codon usage.

482  
483 Almost a quarter of the 1,683,203 genes found in the 327 budding yeast genomes deviate from  
484 the neutral expectation by at least 10%. These results are consistent with the observation that  
485 codon bias varies between transcripts within a species (Sharp et al. 1988; Chen et al. 2004) and is

486 associated with increased expression. In fact, for the species *Saccharomyces mikatae*, the degree  
487 to which a transcript differs from the neutral expectation (greater residual) is moderately  
488 associated with greater expression at steady state ( $R^2$  of 0.414; Supplementary Figure 3;  
489 Tsankov et al. 2010). For the majority of the species examined (320), mutational bias is not the  
490 only force influencing codon bias among transcripts.

491  
492 Assessing how translational selection may influence codon usage bias within species, we found  
493 that the majority of species exhibited moderate or high contribution of selection to the variation  
494 in codon bias (Fig. 6A). Previous work suggested a model in which the highest amount of  
495 selection on synonymous codon usage occurs at intermediate genome size. At the lower end of  
496 genome size, low selection is hypothesized to be due to the correlation between small genomes  
497 and small tRNAomes with low tRNA gene redundancy. In turn, low tRNA gene redundancy  
498 restricts the ability of selection to act on codon bias (Kanaya et al. 1999; dos Reis et al. 2004). At  
499 the larger end of genome size, low selection is hypothesized to be due to drift in species with  
500 small effective population sizes: this drift would increase the genome size and decrease the  
501 ability of selection to shape codon usage (Bulmer 1991). Within Saccharomycotina, the role of  
502 tRNAome size is consistent with these predictions, except for genome size. This exception is  
503 likely due to a low correlation between genome size and tRNAome size in this group. While  
504 tRNAome size and genome size are positively correlated when analyzed using a phylogenetically  
505 independent contrast (PIC) (Felsenstein 1985), this correlation is not very strong (adjusted  $R^2$  of  
506 0.1629.)

507

508 In summary, we find that the balance between neutral and selective forces on codon usage varies  
509 between genomes, between codons, and between genes within a genome. Some  
510 Saccharomycotina species exhibit nearly neutral codon usage in line with those observed in  
511 humans or bacteria, such as *Helicobacter pylori*, while other budding yeast species show  
512 extremely high adaptation to the tRNA pool through translational selection (dos Reis et al. 2004).  
513 This range in the magnitude of forces acting on codon usage in the Saccharomycotina and the  
514 low explanatory power of the factors examined suggest that it is difficult to predict *a priori*  
515 selection on codon bias based on lineage, cellularity, genome size, tRNAome, or GC  
516 composition.

517

518 There is moderate to strong evidence for translational selection in most budding yeast genomes  
519 examined. This trend may be due to the rapid growth that characterizes most budding yeasts:  
520 growth efficiency has been linked to translational selection in codon usage (Andersson and  
521 Kurland 1991; Kurland 1991). One interesting implication of this abundance of translational  
522 selection is that codon optimization may be a useful proxy for highly expressed genes. It has  
523 long been known that ribosomal genes are among both the most highly expressed and highly  
524 codon usage-optimized genes across species (Shields et al. 1988; Sharp et al. 1995), leading to  
525 their use as the basis for the codon adaptation index (Sharp and Li 1987; Nakamura and Tabata  
526 1997). In our dataset, there are 11,047 genes (average of 35 per species) that are as highly or  
527 more highly optimized than the ribosomal genes, suggesting there is a wealth of information  
528 about which genes may be highly expressed or differentially highly expressed across this lineage.

529

530 **Acknowledgements**



531 We thank the members of the Rokas and Hittinger labs, in particular Xing-Xing Shen, for their  
532 feedback and discussions on this project. We would also like to thank the other members of the  
533 Y1000+ project (<http://www.y1000plus.org/>) including, Jacek Kominek and Xiaofan Zhou, for  
534 their feedback. We would also like to thank Renana Sabi, Renana Volvovitch Daniel and Tamir  
535 Tuller, the creators of stAlcalc, for their assistance in troubleshooting the codon adaptation  
536 analysis.

537

## 538 **References**

539 Agashe D, Martinez-Gomez NC, Drummond DA, Marx CJ. 2013. Good codons, bad transcript:  
540 large reductions in gene expression and fitness arising from synonymous mutations in a  
541 key enzyme. *Mol Biol Evol* **30**: 549-560.

542 Air GM, Blackburn EH, Coulson AR, Galibert F, Sanger F, Sedat JW, Ziff EB. 1976. Gene F of  
543 bacteriophage phiX174. Correlation of nucleotide sequences from the DNA and amino  
544 acid sequences from the gene product. *J Mol Biol* **107**: 445-458.

545 Altschul SF, Gish W, Miller W, Myers EW, Lipman DJ. 1990. Basic local alignment search tool.  
546 *J Mol Biol* **215**: 403-410.

547 Andersson GE, Kurland CG. 1991. An extreme codon preference strategy: codon reassignment.  
548 *Mol Biol Evol* **8**: 530-544.

549 Artieri CG, Fraser HB. 2014. Accounting for biases in riboprofiling data indicates a major role  
550 for proline in stalling translation. *Genome Res* **24**: 2011-2021.

551 Ballard A, Bieniek S, Carlini DB. 2019. The fitness consequences of synonymous mutations in  
552 *Escherichia coli*: Experimental evidence for a pleiotropic effect of translational selection.  
553 *Gene* **694**: 111-120.

- 554 Blomberg SP, Garland T, Jr., Ives AR. 2003. Testing for phylogenetic signal in comparative  
555 data: behavioral traits are more labile. *Evolution* **57**: 717-745.
- 556 Buhr F, Jha S, Thommen M, Mittelstaet J, Kutz F, Schwalbe H, Rodnina MV, Komar AA. 2016.  
557 Synonymous Codons Direct Cotranslational Folding toward Different Protein  
558 Conformations. *Mol Cell* **61**: 341-351.
- 559 Bulmer M. 1991. The selection-mutation-drift theory of synonymous codon usage. *Genetics* **129**:  
560 897-907.
- 561 Camacho C, Coulouris G, Avagyan V, Ma N, Papadopoulos J, Bealer K, Madden TL. 2009.  
562 BLAST+: architecture and applications. *BMC Bioinformatics* **10**: 421.
- 563 Carlini DB, Stephan W. 2003. In vivo introduction of unpreferred synonymous codons into the  
564 *Drosophila Adh* gene results in reduced levels of ADH protein. *Genetics* **163**: 239-243.
- 565 Chamary JV, Parmley JL, Hurst LD. 2006. Hearing silence: non-neutral evolution at  
566 synonymous sites in mammals. *Nat Rev Genet* **7**: 98-108.
- 567 Chen SL, Lee W, Hottes AK, Shapiro L, McAdams HH. 2004. Codon usage between genomes is  
568 constrained by genome-wide mutational processes. *Proc Natl Acad Sci U S A* **101**: 3480-  
569 3485.
- 570 Chevance FF, Le Guyon S, Hughes KT. 2014. The effects of codon context on in vivo translation  
571 speed. *PLoS Genet* **10**: e1004392.
- 572 Clement Y, Sarah G, Holtz Y, Homa F, Pointet S, Contreras S, Nabholz B, Sabot F, Saune L,  
573 Ardisson M et al. 2017. Evolutionary forces affecting synonymous variations in plant  
574 genomes. *PLoS Genet* **13**: e1006799.

- 575 Doerfel LK, Wohlgemuth I, Kothe C, Peske F, Urlaub H, Rodnina MV. 2013. EF-P is essential  
576 for rapid synthesis of proteins containing consecutive proline residues. *Science* **339**: 85-  
577 88.
- 578 Donahue TF, Farabaugh PJ, Fink GR. 1981. Suppressible four-base glycine and proline codons  
579 in yeast. *Science* **212**: 455-457.
- 580 dos Reis M, Savva R, Wernisch L. 2004. Solving the riddle of codon usage preferences: a test for  
581 translational selection. *Nucleic Acids Res* **32**: 5036-5044.
- 582 Duret L, Mouchiroud D. 1999. Expression pattern and, surprisingly, gene length shape codon  
583 usage in *Caenorhabditis*, *Drosophila*, and *Arabidopsis*. *Proc Natl Acad Sci U S A* **96**:  
584 4482-4487.
- 585 el-Sherbeini M, Bostian KA, Levitre J, Mitchell DJ. 1987. Gene-protein assignments within the  
586 yeast *Yarrowia lipolytica* dsRNA viral genome. *Curr Genet* **11**: 483-490.
- 587 Felsenstein J. 1985. Phylogenies and the comparative method. *The American Naturalist* **125**: 1-  
588 15.
- 589 Fiers W, Contreras R, Duerinck F, Haegeman G, Iserentant D, Merregaert J, Min Jou W,  
590 Molemans F, Raeymaekers A, Van den Berghe A et al. 1976. Complete nucleotide  
591 sequence of bacteriophage MS2 RNA: primary and secondary structure of the replicase  
592 gene. *Nature* **260**: 500-507.
- 593 Fragata I, Matuszewski S, Schmitz MA, Bataillon T, Jensen JD, Bank C. 2018. The fitness  
594 landscape of the codon space across environments. *Heredity (Edinb)* **121**: 422-437.
- 595 Gaber RF, Culbertson MR. 1982. The yeast frameshift suppressor gene *SUF16-1* encodes an  
596 altered glycine tRNA containing the four-base anticodon 3'-CCCG-5'. *Gene* **19**: 163-172.

- 597 Galtier N, Piganeau G, Mouchiroud D, Duret L. 2001. GC-content evolution in mammalian  
598 genomes: the biased gene conversion hypothesis. *Genetics* **159**: 907-911.
- 599 Galtier N, Roux C, Rousselle M, Romiguier J, Figuet E, Glemin S, Bierne N, Duret L. 2018.  
600 Codon Usage Bias in Animals: Disentangling the Effects of Natural Selection, Effective  
601 Population Size, and GC-Biased Gene Conversion. *Mol Biol Evol* **35**: 1092-1103.
- 602 Gouy M, Gautier C. 1982. Codon usage in bacteria: correlation with gene expressivity. *Nucleic  
603 Acids Res* **10**: 7055-7074.
- 604 Grantham R, Gautier C, Gouy M. 1980. Codon frequencies in 119 individual genes confirm  
605 consistent choices of degenerate bases according to genome type. *Nucleic Acids Res* **8**:  
606 1893-1912.
- 607 Grantham R, Gautier C, Gouy M, Jacobzone M, Mercier R. 1981. Codon catalog usage is a  
608 genome strategy modulated for gene expressivity. *Nucleic Acids Res* **9**: r43-74.
- 609 Harrison RJ, Charlesworth B. 2011. Biased gene conversion affects patterns of codon usage and  
610 amino acid usage in the *Saccharomyces sensu stricto* group of yeasts. *Mol Biol Evol* **28**:  
611 117-129.
- 612 Hershberg R, Petrov DA. 2008. Selection on codon bias. *Annu Rev Genet* **42**: 287-299.
- 613 Ikemura T. 1981a. Correlation between the abundance of *Escherichia coli* transfer RNAs and the  
614 occurrence of the respective codons in its protein genes. *J Mol Biol* **146**: 1-21.
- 615 Ikemura T. 1981b. Correlation between the abundance of *Escherichia coli* transfer RNAs and the  
616 occurrence of the respective codons in its protein genes: a proposal for a synonymous  
617 codon choice that is optimal for the *E. coli* translational system. *J Mol Biol* **151**: 389-409.
- 618 Ikemura T. 1985. Codon usage and tRNA content in unicellular and multicellular organisms. *Mol  
619 Biol Evol* **2**: 13-34.

- 620 Ives AR, Midford PE, Garland T. 2007. Within-species variation and measurement error in  
621 phylogenetic comparative methods. *Systematic Biol* **56**: 252-270.
- 622 Kanaya S, Yamada Y, Kudo Y, Ikemura T. 1999. Studies of codon usage and tRNA genes of 18  
623 unicellular organisms and quantification of *Bacillus subtilis* tRNAs: gene expression  
624 level and species-specific diversity of codon usage based on multivariate analysis. *Gene*  
625 **238**: 143-155.
- 626 Kawaguchi Y, Honda H, Taniguchi-Morimura J, Iwasaki S. 1989. The codon CUG is read as  
627 serine in an asporogenic yeast *Candida cylindracea*. *Nature* **341**: 164-166.
- 628 Kliman RM, Irving N, Santiago M. 2003. Selection conflicts, gene expression, and codon usage  
629 trends in yeast. *J Mol Evol* **57**: 98-109.
- 630 Knight RD, Freeland SJ, Landweber LF. 2001. A simple model based on mutation and selection  
631 explains trends in codon and amino-acid usage and GC composition within and across  
632 genomes. *Genome Biol* **2**: RESEARCH0010.
- 633 Krassowski T, Coughlan AY, Shen XX, Zhou X, Kominek J, Opulente DA, Riley R, Grigoriev  
634 IV, Maheshwari N, Shields DC et al. 2018. Evolutionary instability of CUG-Leu in the  
635 genetic code of budding yeasts. *Nat Commun* **9**: 1887.
- 636 Krisko A, Copic T, Gabaldon T, Lehner B, Supek F. 2014. Inferring gene function from  
637 evolutionary change in signatures of translation efficiency. *Genome Biol* **15**: R44.
- 638 Kurland CG. 1991. Codon bias and gene expression. *FEBS Lett* **285**: 165-169.
- 639 Kurtzman C, Fell JW, Boekhout T. 2011. *The yeasts: a taxonomic study*. Elsevier.
- 640 Letzring DP, Dean KM, Grayhack EJ. 2010. Control of translation efficiency in yeast by codon-  
641 anticodon interactions. *RNA* **16**: 2516-2528.

- 642 Letzring DP, Wolf AS, Brule CE, Grayhack EJ. 2013. Translation of CGA codon repeats in yeast  
643 involves quality control components and ribosomal protein L1. *RNA* **19**: 1208-1217.
- 644 Lowe TM, Chan PP. 2016. tRNAscan-SE On-line: integrating search and context for analysis of  
645 transfer RNA genes. *Nucleic Acids Res* **44**: W54-57.
- 646 Massey SE, Moura G, Beltrao P, Almeida R, Garey JR, Tuite MF, Santos MA. 2003.  
647 Comparative evolutionary genomics unveils the molecular mechanism of reassignment of  
648 the CTG codon in *Candida* spp. *Genome Res* **13**: 544-557.
- 649 McVean GA, Vieira J. 2001. Inferring parameters of mutation, selection and demography from  
650 patterns of synonymous site evolution in *Drosophila*. *Genetics* **157**: 245-257.
- 651 Miranda I, Silva R, Santos MA. 2006. Evolution of the genetic code in yeasts. *Yeast* **23**: 203-213.
- 652 Mittal P, Brindle J, Stephen J, Plotkin JB, Kudla G. 2018. Codon usage influences fitness  
653 through RNA toxicity. *Proc Natl Acad Sci U S A* **115**: 8639-8644.
- 654 Muhlhausen S, Findeisen P, Plessmann U, Urlaub H, Kollmar M. 2016. A novel nuclear genetic  
655 code alteration in yeasts and the evolution of codon reassignment in eukaryotes. *Genome*  
656 *Res* **26**: 945-955.
- 657 Muhlhausen S, Schmitt HD, Pan KT, Plessmann U, Urlaub H, Hurst LD, Kollmar M. 2018.  
658 Endogenous Stochastic Decoding of the CUG Codon by Competing Ser- and Leu-tRNAs  
659 in *Ascoidea asiatica*. *Curr Biol* **28**: 2046-2057 e2045.
- 660 Nakamura K, Pirtle RM, Pirtle IL, Takeishi K, Inouye M. 1980. Messenger ribonucleic acid of  
661 the lipoprotein of the *Escherichia coli* outer membrane. II. The complete nucleotide  
662 sequence. *J Biol Chem* **255**: 210-216.
- 663 Nakamura Y, Tabata S. 1997. Codon-anticodon assignment and detection of codon usage trends  
664 in seven microbial genomes. *Microb Comp Genomics* **2**: 299-312.

- 665 Opulente DA, Rollinson EJ, Bernick-Roehr C, Hulfachor AB, Rokas A, Kurtzman CP, Hittinger  
666 CT. 2018. Factors driving metabolic diversity in the budding yeast subphylum. *BMC Biol*  
667 **16**: 26.
- 668 Pagel M. 1999. Inferring the historical patterns of biological evolution. *Nature* **401**: 877-884.
- 669 Palidwor GA, Perkins TJ, Xia X. 2010. A general model of codon bias due to GC mutational  
670 bias. *PLoS One* **5**: e13431.
- 671 Pavlov MY, Watts RE, Tan Z, Cornish VW, Ehrenberg M, Forster AC. 2009. Slow peptide bond  
672 formation by proline and other N-alkylamino acids in translation. *Proc Natl Acad Sci U S*  
673 *A* **106**: 50-54.
- 674 Pechmann S, Chartron JW, Frydman J. 2014. Local slowdown of translation by nonoptimal  
675 codons promotes nascent-chain recognition by SRP in vivo. *Nat Struct Mol Biol* **21**:  
676 1100-1105.
- 677 Post LE, Strycharz GD, Nomura M, Lewis H, Dennis PP. 1979. Nucleotide sequence of the  
678 ribosomal protein gene cluster adjacent to the gene for RNA polymerase subunit beta in  
679 *Escherichia coli*. *Proc Natl Acad Sci U S A* **76**: 1697-1701.
- 680 Presnyak V, Alhusaini N, Chen YH, Martin S, Morris N, Kline N, Olson S, Weinberg D, Baker  
681 KE, Graveley BR et al. 2015. Codon optimality is a major determinant of mRNA  
682 stability. *Cell* **160**: 1111-1124.
- 683 Radhakrishnan A, Chen YH, Martin S, Alhusaini N, Green R, Collier J. 2016. The DEAD-Box  
684 Protein Dhh1p Couples mRNA Decay and Translation by Monitoring Codon Optimality.  
685 *Cell* **167**: 122-132 e129.
- 686 Revell LJ. 2012. phytools: an R package for phylogenetic comparative biology (and other  
687 things). *Methods Ecol Evol* **3**: 217-223.

- 688 Riley R, Haridas S, Wolfe KH, Lopes MR, Hittinger CT, Goker M, Salamov AA, Wisecaver JH,  
689 Long TM, Calvey CH et al. 2016. Comparative genomics of biotechnologically important  
690 yeasts. *Proc Natl Acad Sci U S A* **113**: 9882-9887.
- 691 Sabi R, Tuller T. 2014. Modelling the efficiency of codon-tRNA interactions based on codon  
692 usage bias. *DNA Res* **21**: 511-526.
- 693 Sauna ZE, Kimchi-Sarfaty C. 2011. Understanding the contribution of synonymous mutations to  
694 human disease. *Nat Rev Genet* **12**: 683-691.
- 695 Sharp PM, Averof M, Lloyd AT, Matassi G, Peden JF. 1995. DNA sequence evolution: the  
696 sounds of silence. *Philos Trans R Soc Lond B Biol Sci* **349**: 241-247.
- 697 Sharp PM, Cowe E, Higgins DG, Shields DC, Wolfe KH, Wright F. 1988. Codon usage patterns  
698 in *Escherichia coli*, *Bacillus subtilis*, *Saccharomyces cerevisiae*, *Schizosaccharomyces*  
699 *pombe*, *Drosophila melanogaster* and *Homo sapiens*; a review of the considerable within-  
700 species diversity. *Nucleic Acids Res* **16**: 8207-8211.
- 701 Sharp PM, Li WH. 1986. Codon usage in regulatory genes in *Escherichia coli* does not reflect  
702 selection for 'rare' codons. *Nucleic Acids Res* **14**: 7737-7749.
- 703 Sharp PM, Li WH. 1987. The codon Adaptation Index--a measure of directional synonymous  
704 codon usage bias, and its potential applications. *Nucleic Acids Res* **15**: 1281-1295.
- 705 Sharp PM, Stenico M, Peden JF, Lloyd AT. 1993. Codon usage: mutational bias, translational  
706 selection, or both? *Biochem Soc Trans* **21**: 835-841.
- 707 She R, Jarosz DF. 2018. Mapping Causal Variants with Single-Nucleotide Resolution Reveals  
708 Biochemical Drivers of Phenotypic Change. *Cell* **172**: 478-490 e415.



- 709 Shen XX, Opulente DA, Kominek J, Zhou X, Steenwyk JL, Buh KV, Haase MAB, Wisecaver  
710 JH, Wang M, Doering DT et al. 2018. Tempo and Mode of Genome Evolution in the  
711 Budding Yeast Subphylum. *Cell* **175**: 1533-1545 e1520.
- 712 Shields DC, Sharp PM. 1987. Synonymous codon usage in *Bacillus subtilis* reflects both  
713 translational selection and mutational biases. *Nucleic Acids Res* **15**: 8023-8040.
- 714 Shields DC, Sharp PM, Higgins DG, Wright F. 1988. "Silent" sites in *Drosophila* genes are not  
715 neutral: evidence of selection among synonymous codons. *Mol Biol Evol* **5**: 704-716.
- 716 Stoletzki N, Eyre-Walker A. 2007. Synonymous codon usage in *Escherichia coli*: selection for  
717 translational accuracy. *Mol Biol Evol* **24**: 374-381.
- 718 Sun X, Yang Q, Xia X. 2013. An improved implementation of effective number of codons (nc).  
719 *Mol Biol Evol* **30**: 191-196.
- 720 Sun Y, Tamarit D, Andersson SGE. 2017. Switches in Genomic GC Content Drive Shifts of  
721 Optimal Codons under Sustained Selection on Synonymous Sites. *Genome Biol Evol* **9**:  
722 2560-2579.
- 723 Supek F, Minana B, Valcarcel J, Gabaldon T, Lehner B. 2014. Synonymous mutations  
724 frequently act as driver mutations in human cancers. *Cell* **156**: 1324-1335.
- 725 Suzuki H, Brown CJ, Forney LJ, Top EM. 2008. Comparison of correspondence analysis  
726 methods for synonymous codon usage in bacteria. *DNA Res* **15**: 357-365.
- 727 Thomas LK, Dix DB, Thompson RC. 1988. Codon choice and gene expression: synonymous  
728 codons differ in their ability to direct aminoacylated-transfer RNA binding to ribosomes  
729 in vitro. *Proc Natl Acad Sci U S A* **85**: 4242-4246.
- 730 Tréton BY, Le Dall M-T, Heslot H. 1985. Virus-like particles from the yeast *Yarrowia lipolytica*.  
731 *Current genetics* **9**: 279-284.

- 732 Tsankov AM, Thompson DA, Socha A, Regev A, Rando OJ. 2010. The role of nucleosome  
733 positioning in the evolution of gene regulation. *PLoS Biol* **8**: e1000414.
- 734 Tuller T, Waldman YY, Kupiec M, Ruppin E. 2010. Translation efficiency is determined by both  
735 codon bias and folding energy. *Proc Natl Acad Sci U S A* **107**: 3645-3650.
- 736 Wan XF, Xu D, Kleinhofs A, Zhou J. 2004. Quantitative relationship between synonymous  
737 codon usage bias and GC composition across unicellular genomes. *BMC Evol Biol* **4**: 19.
- 738 Wright F. 1990. The 'effective number of codons' used in a gene. *Gene* **87**: 23-29.
- 739 Xia X. 1998. How optimized is the translational machinery in *Escherichia coli*, *Salmonella*  
740 *typhimurium* and *Saccharomyces cerevisiae*? *Genetics* **149**: 37-44.
- 741 Xia X. 2018. DAMBE7: New and Improved Tools for Data Analysis in Molecular Biology and  
742 Evolution. *Mol Biol Evol* **35**: 1550-1552.
- 743 Yu CH, Dang Y, Zhou Z, Wu C, Zhao F, Sachs MS, Liu Y. 2015. Codon Usage Influences the  
744 Local Rate of Translation Elongation to Regulate Co-translational Protein Folding. *Mol*  
745 *Cell* **59**: 744-754.
- 746 Zhou M, Guo J, Cha J, Chae M, Chen S, Barral JM, Sachs MS, Liu Y. 2013. Non-optimal codon  
747 usage affects expression, structure and function of clock protein FRQ. *Nature* **495**: 111-  
748 115.
- 749 Zhou T, Weems M, Wilke CO. 2009. Translationally optimal codons associate with structurally  
750 sensitive sites in proteins. *Mol Biol Evol* **26**: 1571-1580.
- 751 Zhou Z, Dang Y, Zhou M, Yuan H, Liu Y. 2018. Codon usage biases co-evolve with  
752 transcription termination machinery to suppress premature cleavage and polyadenylation.  
753 *Elife* **7**.
- 754

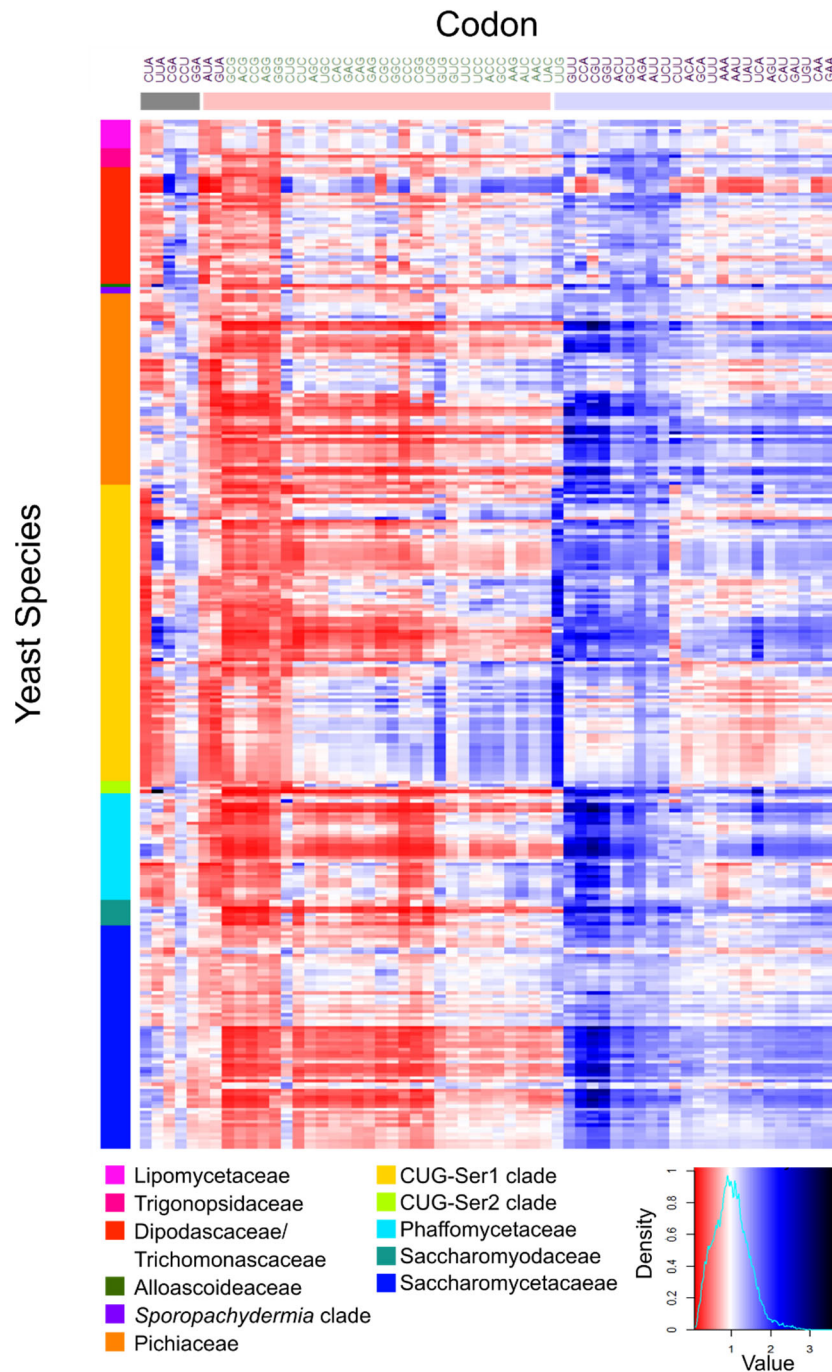

Figure 1. **Relative synonymous codon usage (RSCU) analysis revealed an overrepresentation of A/U-ending codons across most of the Saccharomycotina subphylum.** Columns correspond to the 59 non-degenerate, non-stop codons; A/U-ending codons are shown in purple font, and GC-ending codons are shown in green font. Rows correspond to the 327 Saccharomycotina species colored by major clade, following the recent genome-scale phylogeny of the subphylum (Shen et al. 2018). Blue cells indicate overrepresented codons ( $RSCU > 1$ ) and red cells indicate underrepresented codons ( $RSCU < 1$ ). Codons were clustered (using hierarchical clustering) by RSCU value into three general groups (shown by horizontal bars of different colors): underrepresented A/U-ending codons (grey bar), underrepresented codons mostly ending in G/C (red bar), and overrepresented codons mostly ending in A/U (blue bar).

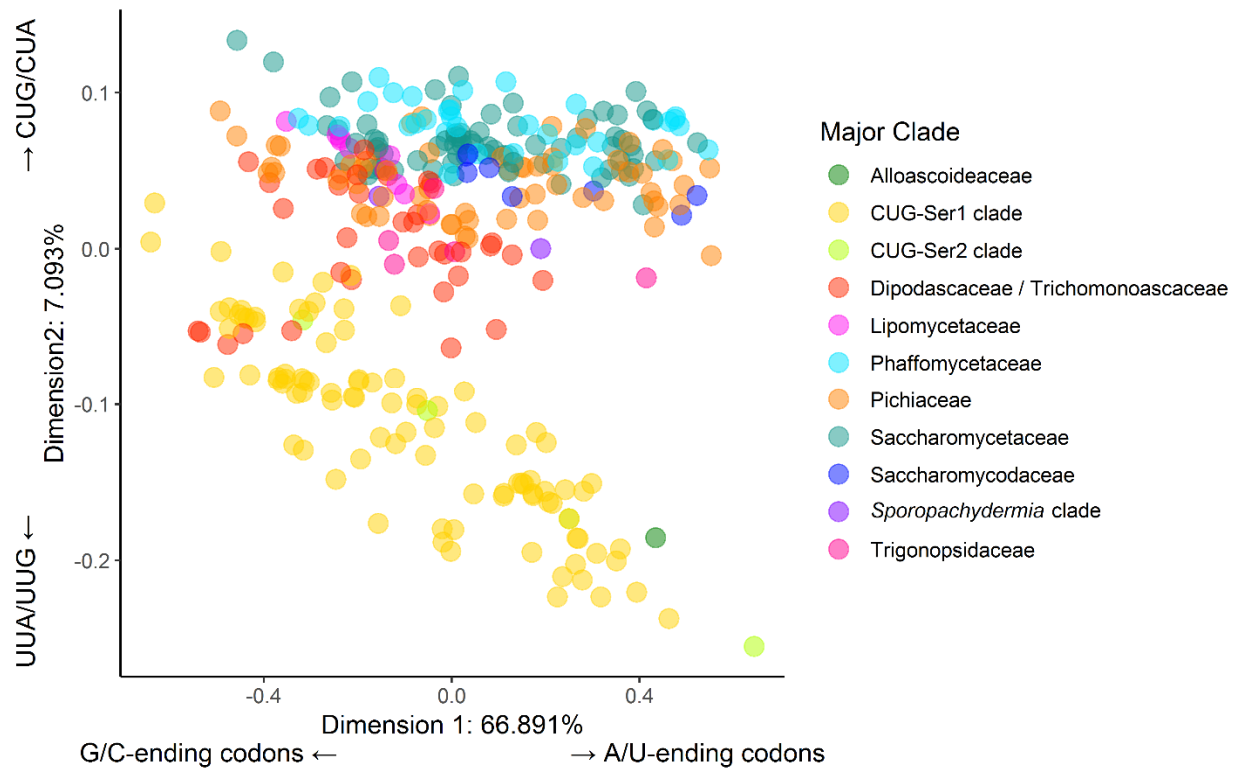

**Figure 2. Differences in relative synonymous codon usage values between species are largely driven by variation in the usage of G/C- and A/U-ending codons.** The plot shows each of the 327 budding yeast species examined in this study along the first two dimensions (the X and Y axes) of a correspondence analysis. Each axis is labeled with the percent variance explained by the corresponding dimension and the codons that are the major drivers of the observed variance. The first dimension, which explains nearly 67% of the variation between species, is driven by the differential usage of G/C- versus A/U-ending codons. The second dimension, which differentiates the CUG-Ser1 clade, the CUG-Ser2 clade, and one *Alloascoideaceae* species from the rest of the species in the subphylum, explains a much smaller fraction of the observed variation (about 7%) and is primarily driven by differential usage of the CUA, CUG, UUG, and UUA codons in the two groups.

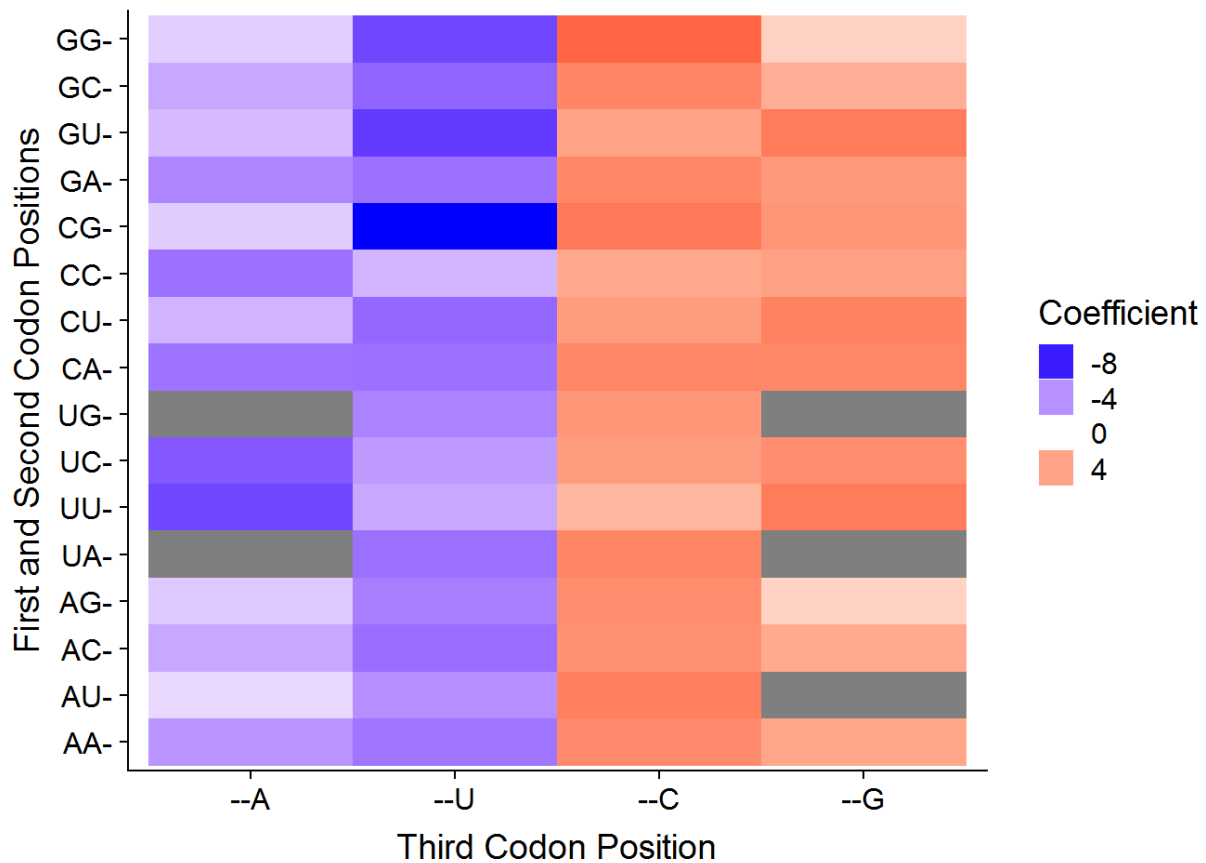

Figure 3. **The high correlation between codon usage and GC composition of the third codon position suggests that codon usage bias at the level of individual codons is likely driven by genetic drift.** The graph illustrates a phylogenetic generalized least squares comparison between relative synonymous codon usage values and third codon position GC composition (GC3) for each codon across the 327 budding yeast species. Colors toward the red spectrum indicate a positive correlation between CG-ending codons and increasing GC3. Blue colors indicate a negative correlation between A/U-ending codons and increasing GC3. Grey cells denote non-degenerate codons encoding methionine or tryptophan or stop codons.

4A

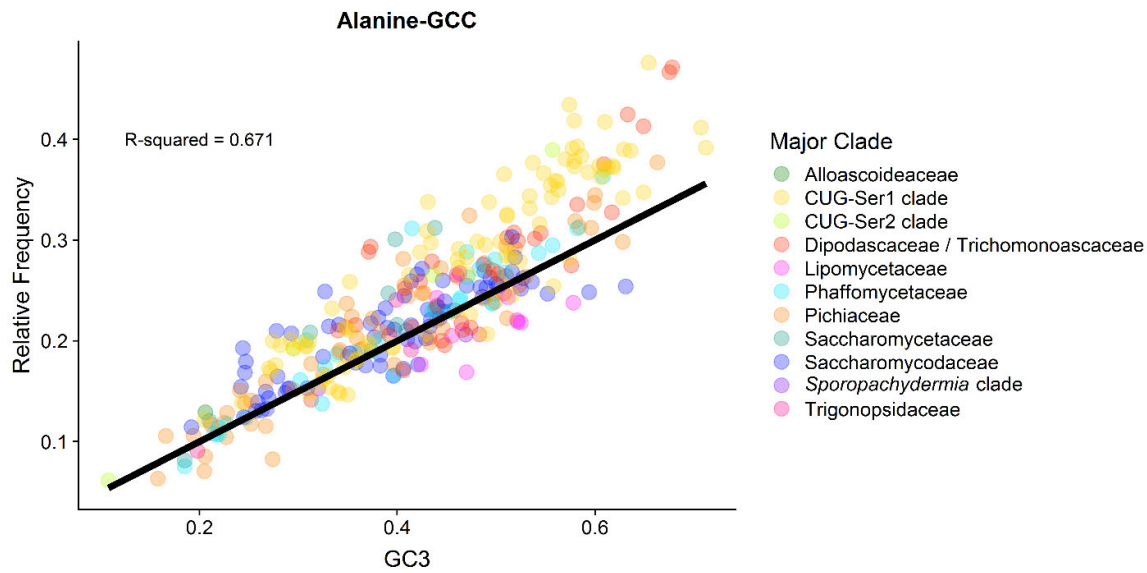

4B

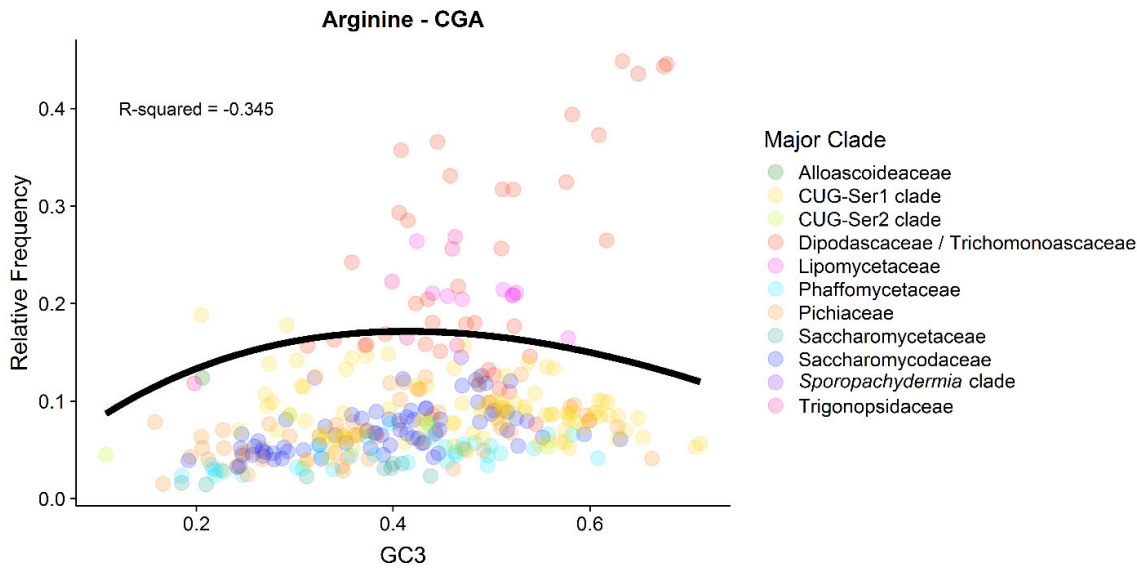

4C

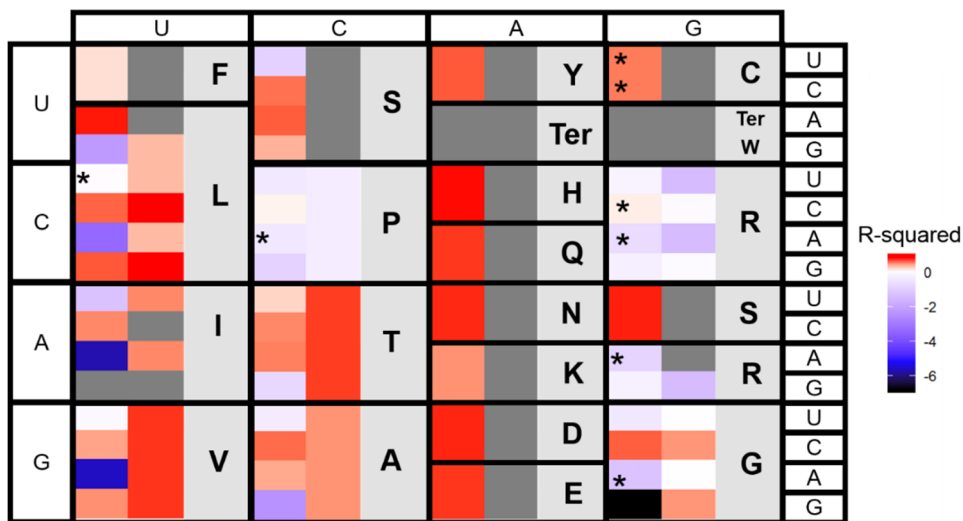

Figure 4. The complex relationship between relative frequency and genome-wide average base composition of the third codon position (GC3) suggests that individual codons vary in their fit to the

**neutral expectation (i.e., that codon usage is solely driven by GC mutational bias and genetic drift).** The neutral expectations for the different codons were obtained from the models developed by Palidwor et al. (2010). A) Observed relative frequency of the alanine codon GCC (shown on the Y axis) plotted against GC3 (shown on the X axis) for each of the 327 budding yeast species analyzed in this study. The codon GCC had a good fit to the neutral expectation (black line, R-squared value = 0.671). B) Observed relative frequency of the arginine codon CGU plotted against GC3 composition for each species. The codon CGU had a poor fit to the neutral expectation (black line, R-squared value = -0.165); the same trend was also observed in the other Group-2 arginine codons (CGA and AGG). C) R-squared values for each of the codons (first column) and the sum of all codons for an amino acid (second column) compared to their neutral expectations. Boxes colored towards the red spectrum indicate a better fit to the neutral model, while boxes colored towards the blue spectrum indicate a poorer fit (i.e., worse than the mean) to the neutral model. Grey-colored boxes in the first column indicate non-degenerate amino acids or stop codons; grey boxes in the second column indicate codons that either have their own models (e.g., ATC) or have values that stem from the same model (e.g., all amino acids encoded by two codons, such as tyrosine (Y), which is encoded by TAT and TAC). Asterisks indicate codons with a Blomberg's K variance over 1 when comparing GC3 and relative frequency, suggesting that the GC3 and relative frequency values for these codons are correlated due to phylogeny (i.e., closely related species tend to have more similar GC3 and relative frequency values due to shared ancestry).



5A

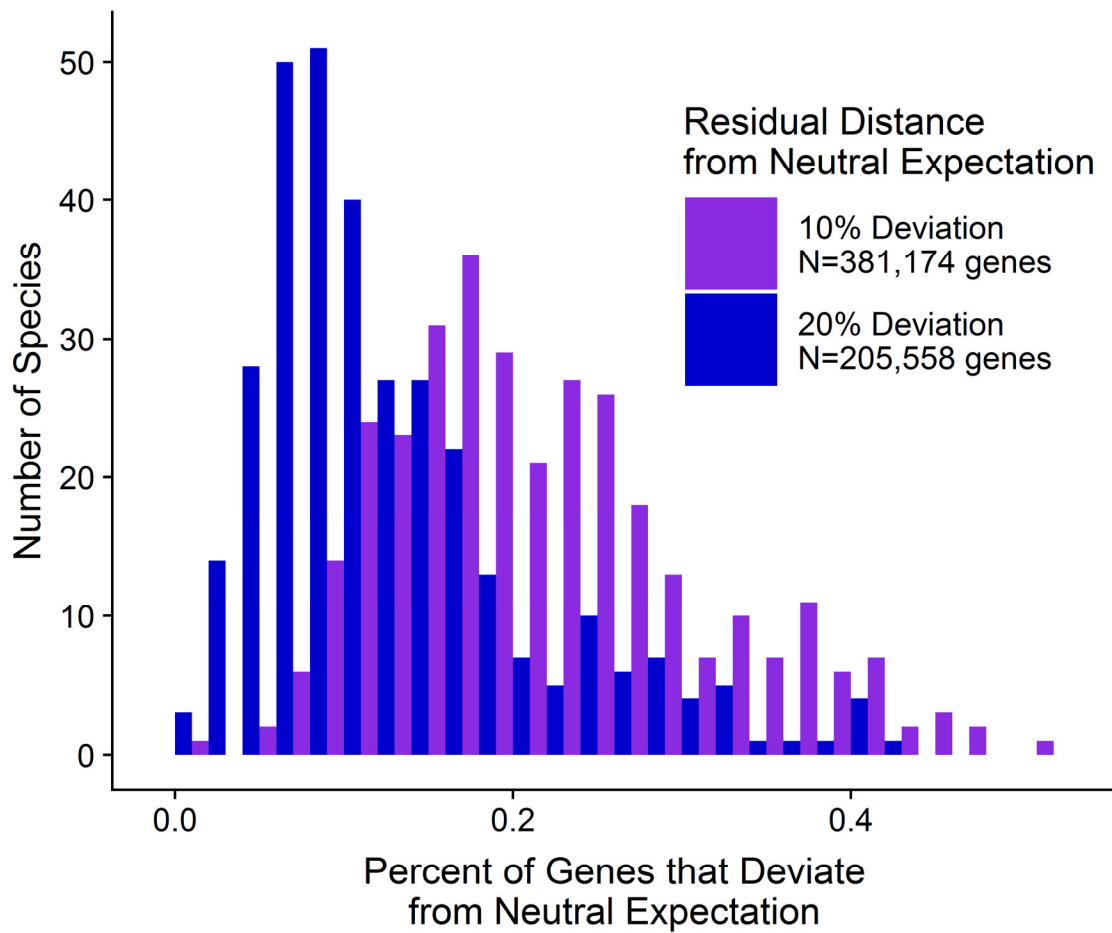

5B

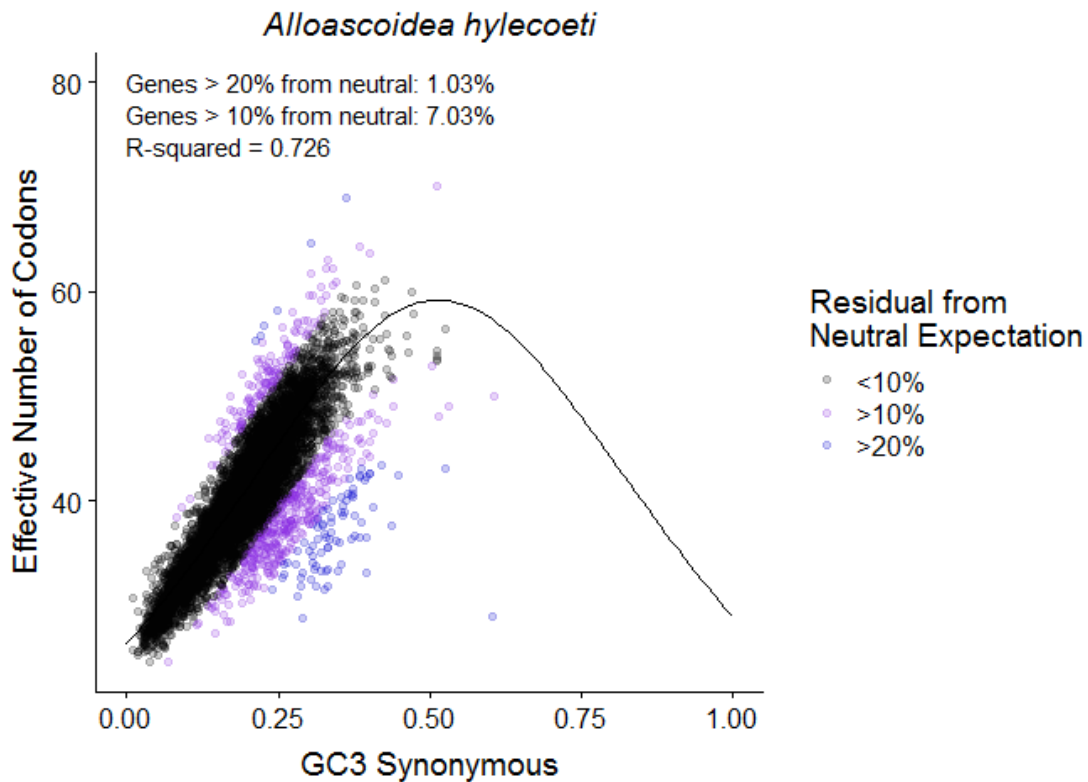



5C

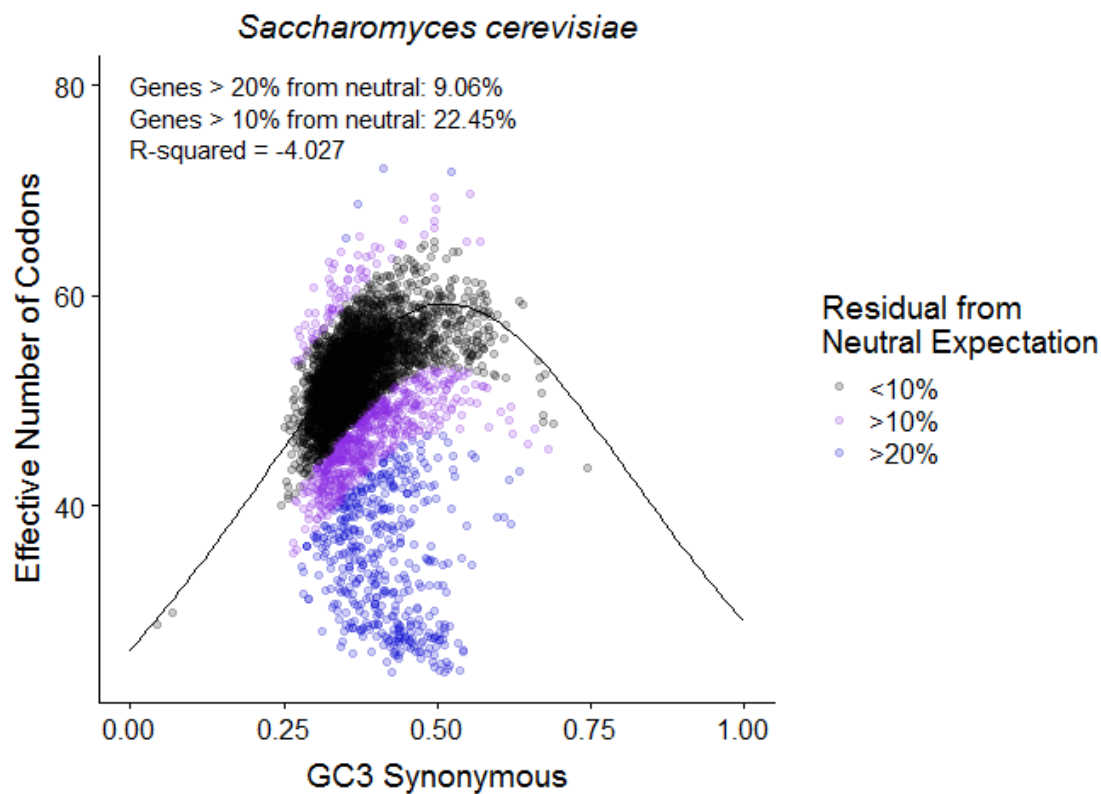

Figure 5. Comparison of the silent third position GC composition (GC3s) to the effective number of codons (Nc) across 327 budding yeast species shows that a significant portion of the genes in many species' genomes deviate substantially from the neutral expectation. A) Distribution of the percentage of genes that deviate more than 10% (purple bars) or 20% (blue bars) from the neutral expectation. Almost half of the genomes have 10% or more of their genes deviate at the 20% threshold (159 / 327), and almost all of the genomes do so at the 10% threshold (309 / 327). B) The genome of the yeast *Alloascoidea hylecoeti* shows a high correlation between GC3s and Nc (R-squared value = 0.762), in line with neutral expectations. The neutral expectation (i.e., the expectation when the only influence is GC mutational bias and genetic drift) of the effective number of codons for a given GC content of third positions in a genome is indicated by the black line. C) In contrast, the genome of *Saccharomyces cerevisiae* shows a lack of correlation between GC3s and Nc (R-squared value = -4.027) and does not conform with the neutral expectation.

6A

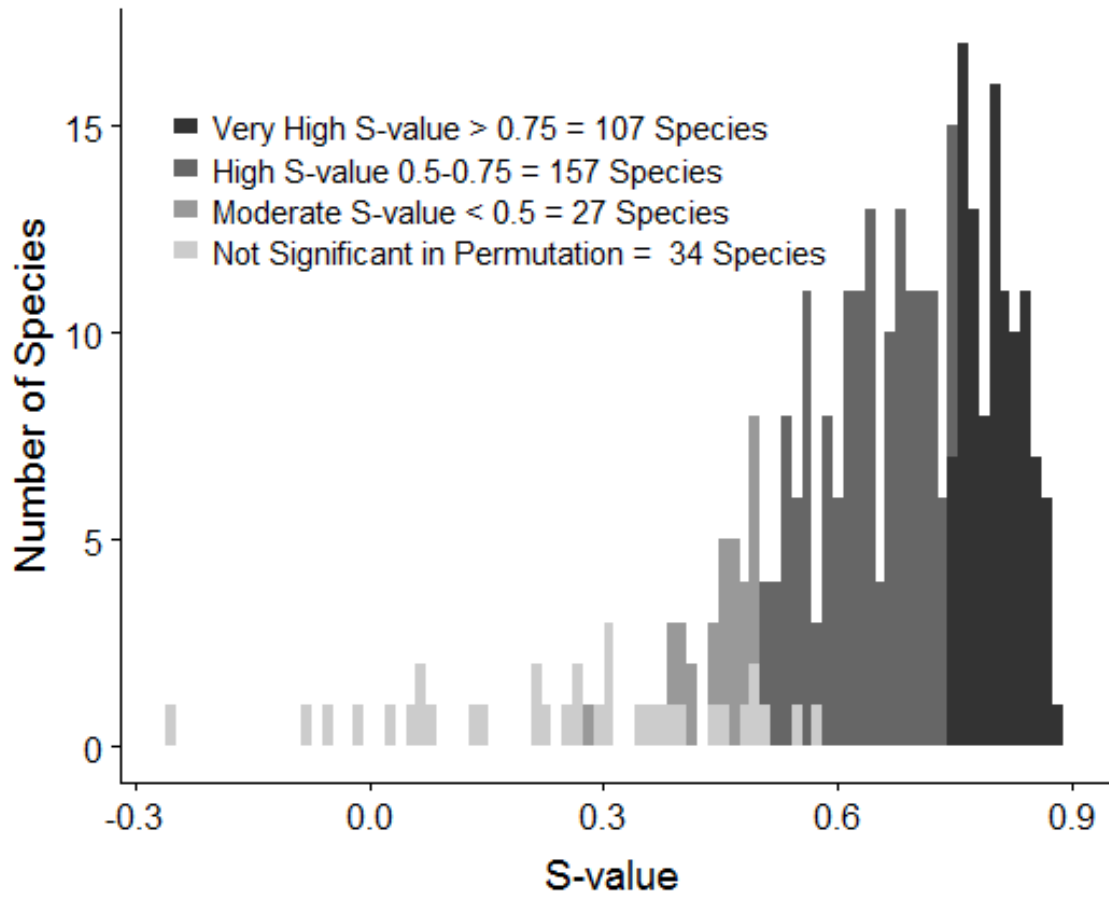

6B

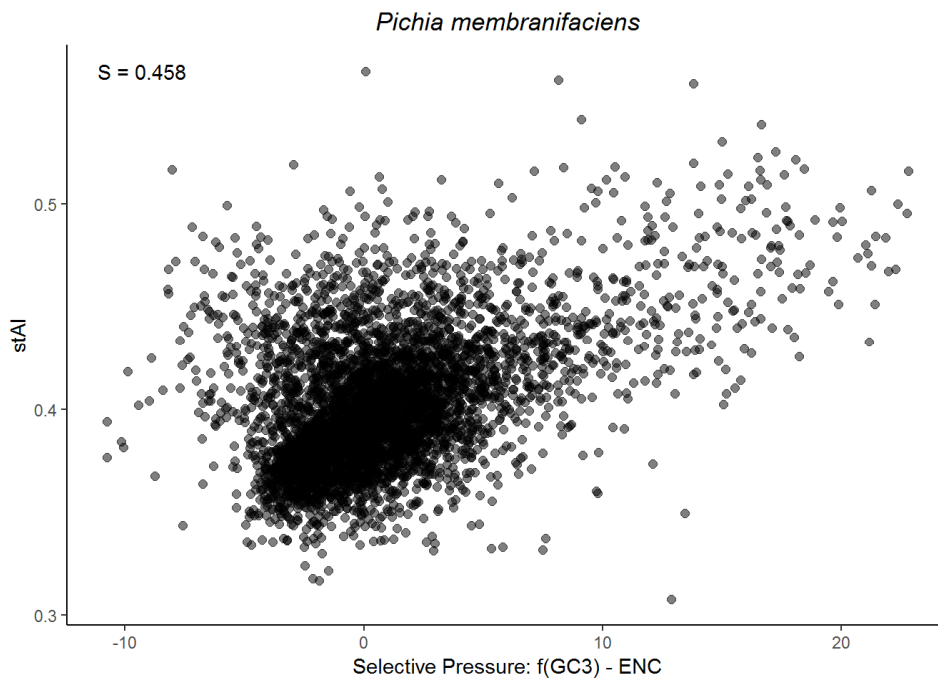

6C

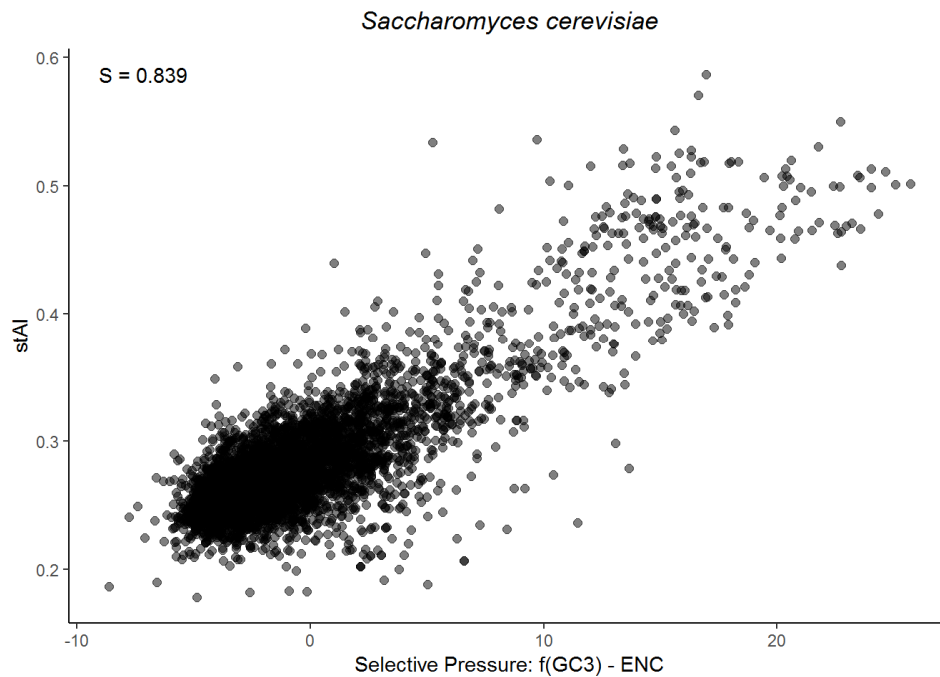

**Figure 6. Most genomes in the budding yeast subphylum exhibit moderate to high levels of translational selection on codon bias.** Translational selection on codon bias was measured using the S-test, which examines the correlation between the stAI value and the selective pressure (estimated by f(GC3)-ENC where f(GC3) is a modified function of Wright's neutral relationship between the silent GC content of a gene and the effective number of codons) on all coding sequences in a genome. Each point in the comparison between stAI and selective pressure is a single coding sequence in one genome. Higher S-values indicate higher levels of translational selection on codon bias. A) Distribution of the significant S-values ( $p < 0.05$  in permutation test; 293 species out of 327) and non-significant S-values ( $p > 0.05$  in permutation test; 34 / 327 species). B) *Pichia membranifaciens*, an example of a species that exhibits low translational selection on codon bias ( $p < 0.05$  in permutation test;  $n = 10,000$ ). C) *Saccharomyces cerevisiae*, an example of a species that exhibits high translational selection on codon bias ( $p < 0.01$  in permutation test;  $n = 10,000$ ).

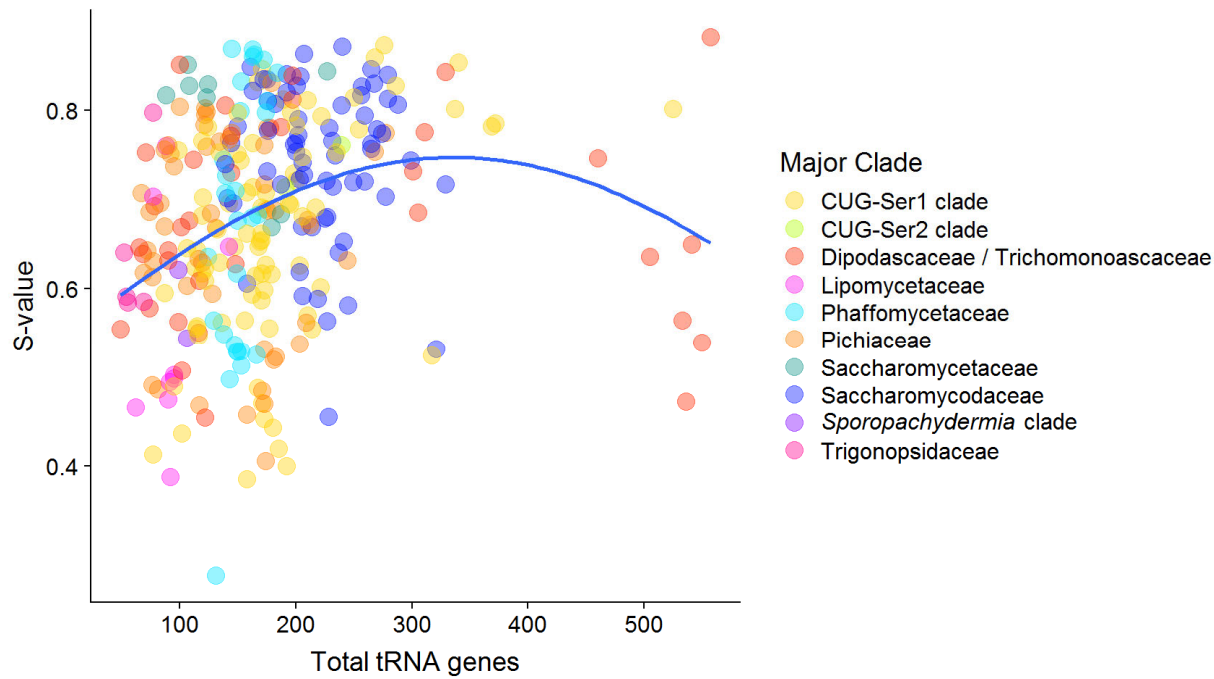

Figure 7. **Maximum translational selection occurs at an intermediate number of total tRNA genes in the genome.** This plot shows the relationship between the total number of tRNA genes in a genome (tRNAome size) and S-value for each the 327 budding yeast species analyzed in this study. The best fitting model (blue) was a Gaussian distribution with a maximum S-value at 336 tRNA genes. This suggests that species with either low or high numbers of total tRNA genes exhibit lower levels of translational selection.
